# Supplementary material
Source: PubMed Central journal article supplement (PMC1550310)
Supplement: bj3980225add.pdf [file bj3980225add.pdf]

# Supplementary Figure 1

**A**

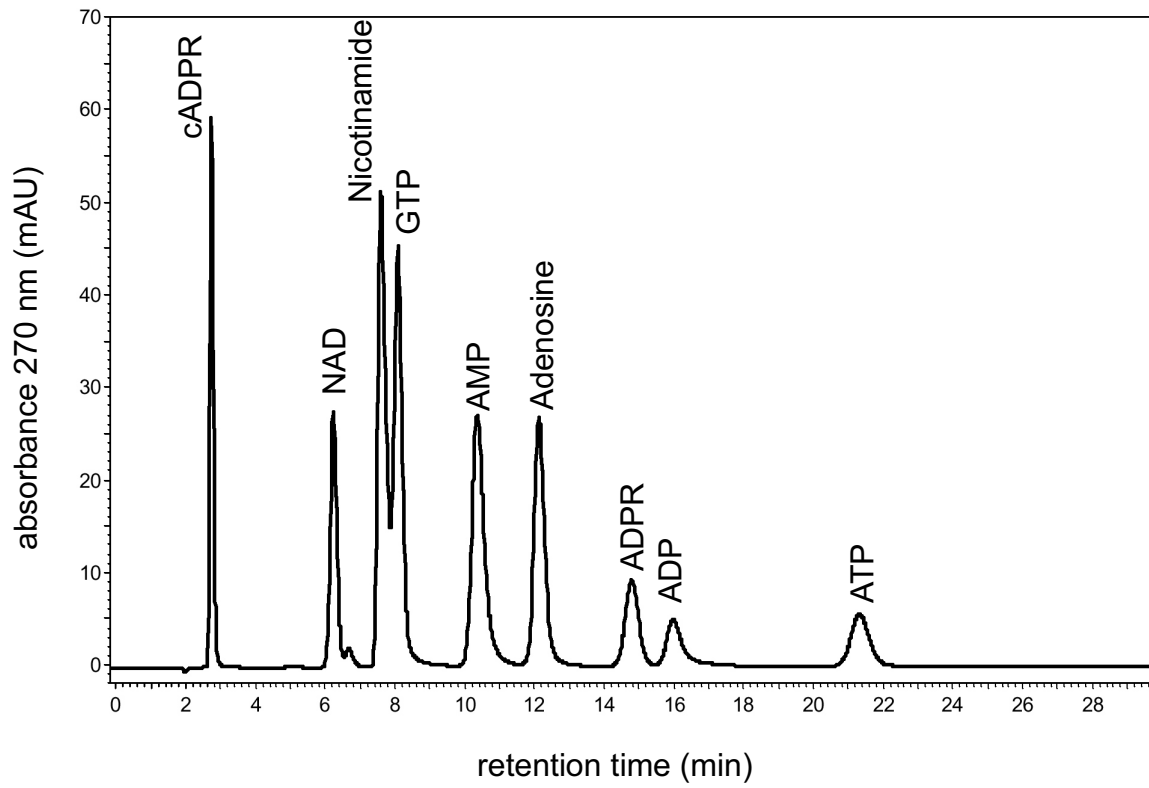

**B**

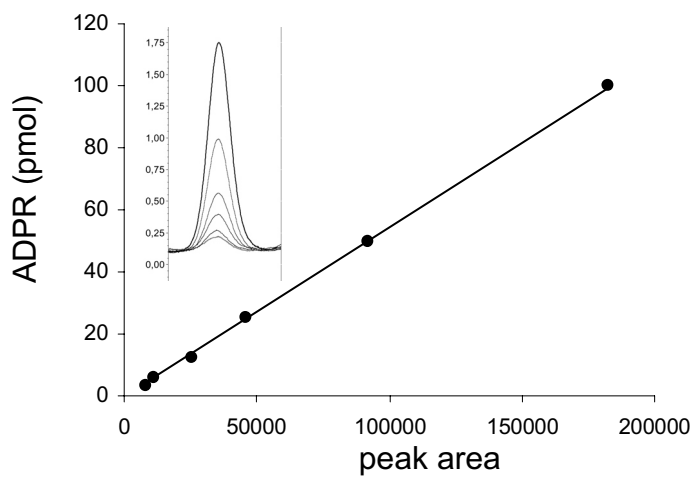

## Supplementary Figure 2

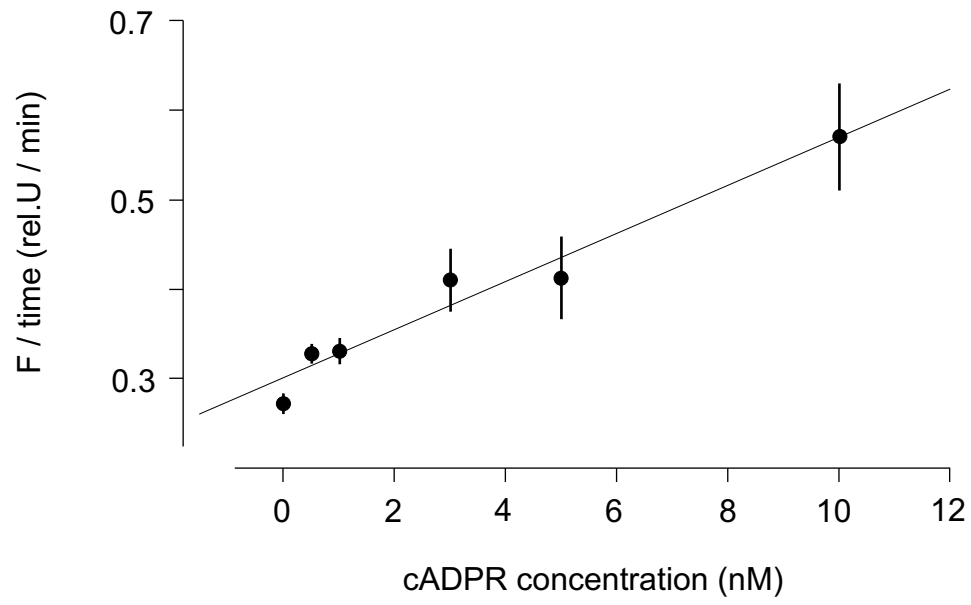

## LEGENDS TO SUPPLEMENTARY FIGURES

### **Supplementary Figure 1: Separation of ADPR by HPLC**

(A) HPLC analysis of a mixture of standard nucleotides (UV absorbance vs. retention time). The peaks were identified from a comparison with standards containing only one nucleotide. The concentrations of ADPR and cADPR were 43 and 64  $\mu\text{M}$ , respectively. (B) Linearity of the ADPR content of the sample and the area (in arbitrary units) of the ADPR peak.

### **Supplementary Figure 2: Calibration curve of the cyclase assay for cADPR**

The rate of increase in fluorescence in standards is plotted against the nominal cADPR concentration. The regression line was used to determine the cADPR concentration in cell extracts (without and with spiking with cADPR).
